# Supplementary material for: Genetic Variants of VEGFA and FLT4 Are Determinants of Survival in Renal Cell Carcinoma Patients Treated with Sorafenib
Source: Oxford University Press journal article supplement (doi:10.1158/0008-5472.can-18-1089), 2018-11-01

**Figure S1. Study schematic for patients genotyped in this study.** Associations with OS were tested using 11,117 genetic variants (1,020 directly genotyped SNPs and 10,097 imputed SNPs and indels) in 295 patients. Abbreviations: indel, insertion/deletion.


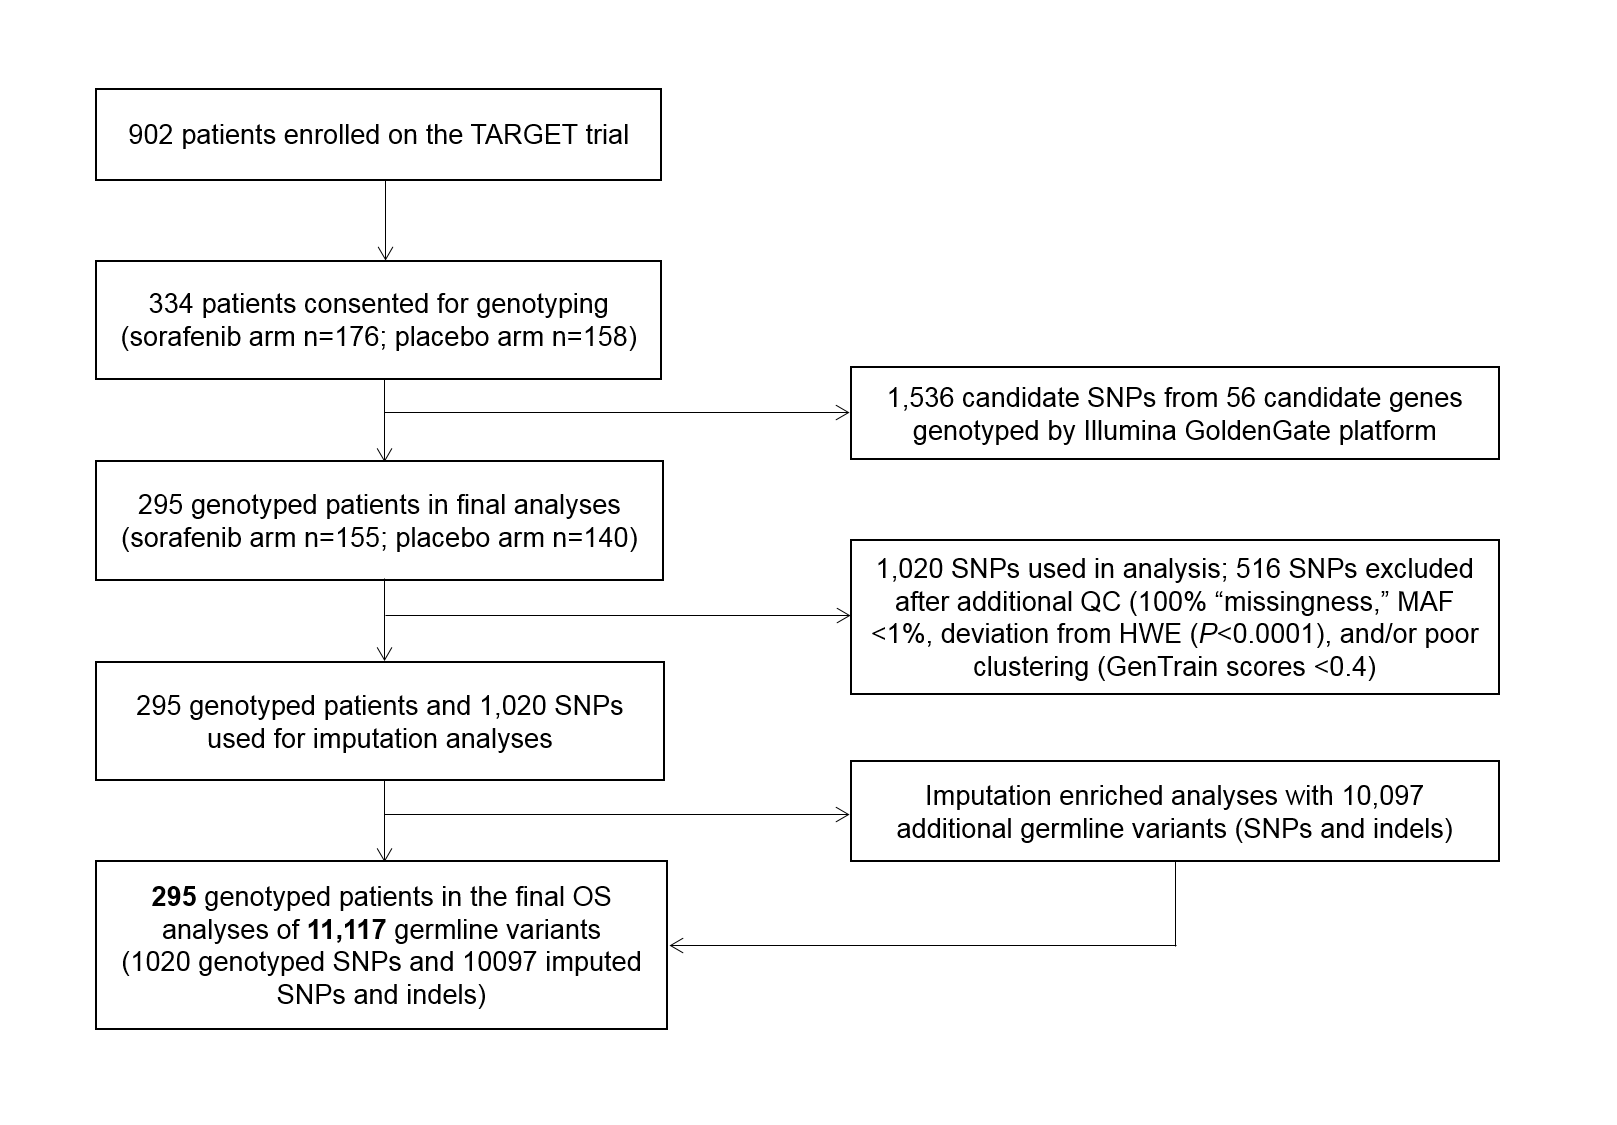

Supplement: 00085472can181089-sup-199993_2_supp_5113439_ph6cbt.docx [file 00085472can181089-sup-199993_2_supp_5113439_ph6cbt.docx]
