# Supplementary material for: Genetic Variants of VEGFA and FLT4 Are Determinants of Survival in Renal Cell Carcinoma Patients Treated with Sorafenib
Source: Oxford University Press journal article supplement (doi:10.1158/0008-5472.can-18-1089), 2018-11-01

**Figure S2. Kaplan-Meier plots of genetic variants versus PFS. A-C)** Variants located in genes in the sorafenib arm. **D-E)** Variants located in genes in both arms combined. Vertical bars on the survival curves indicate censored observations.


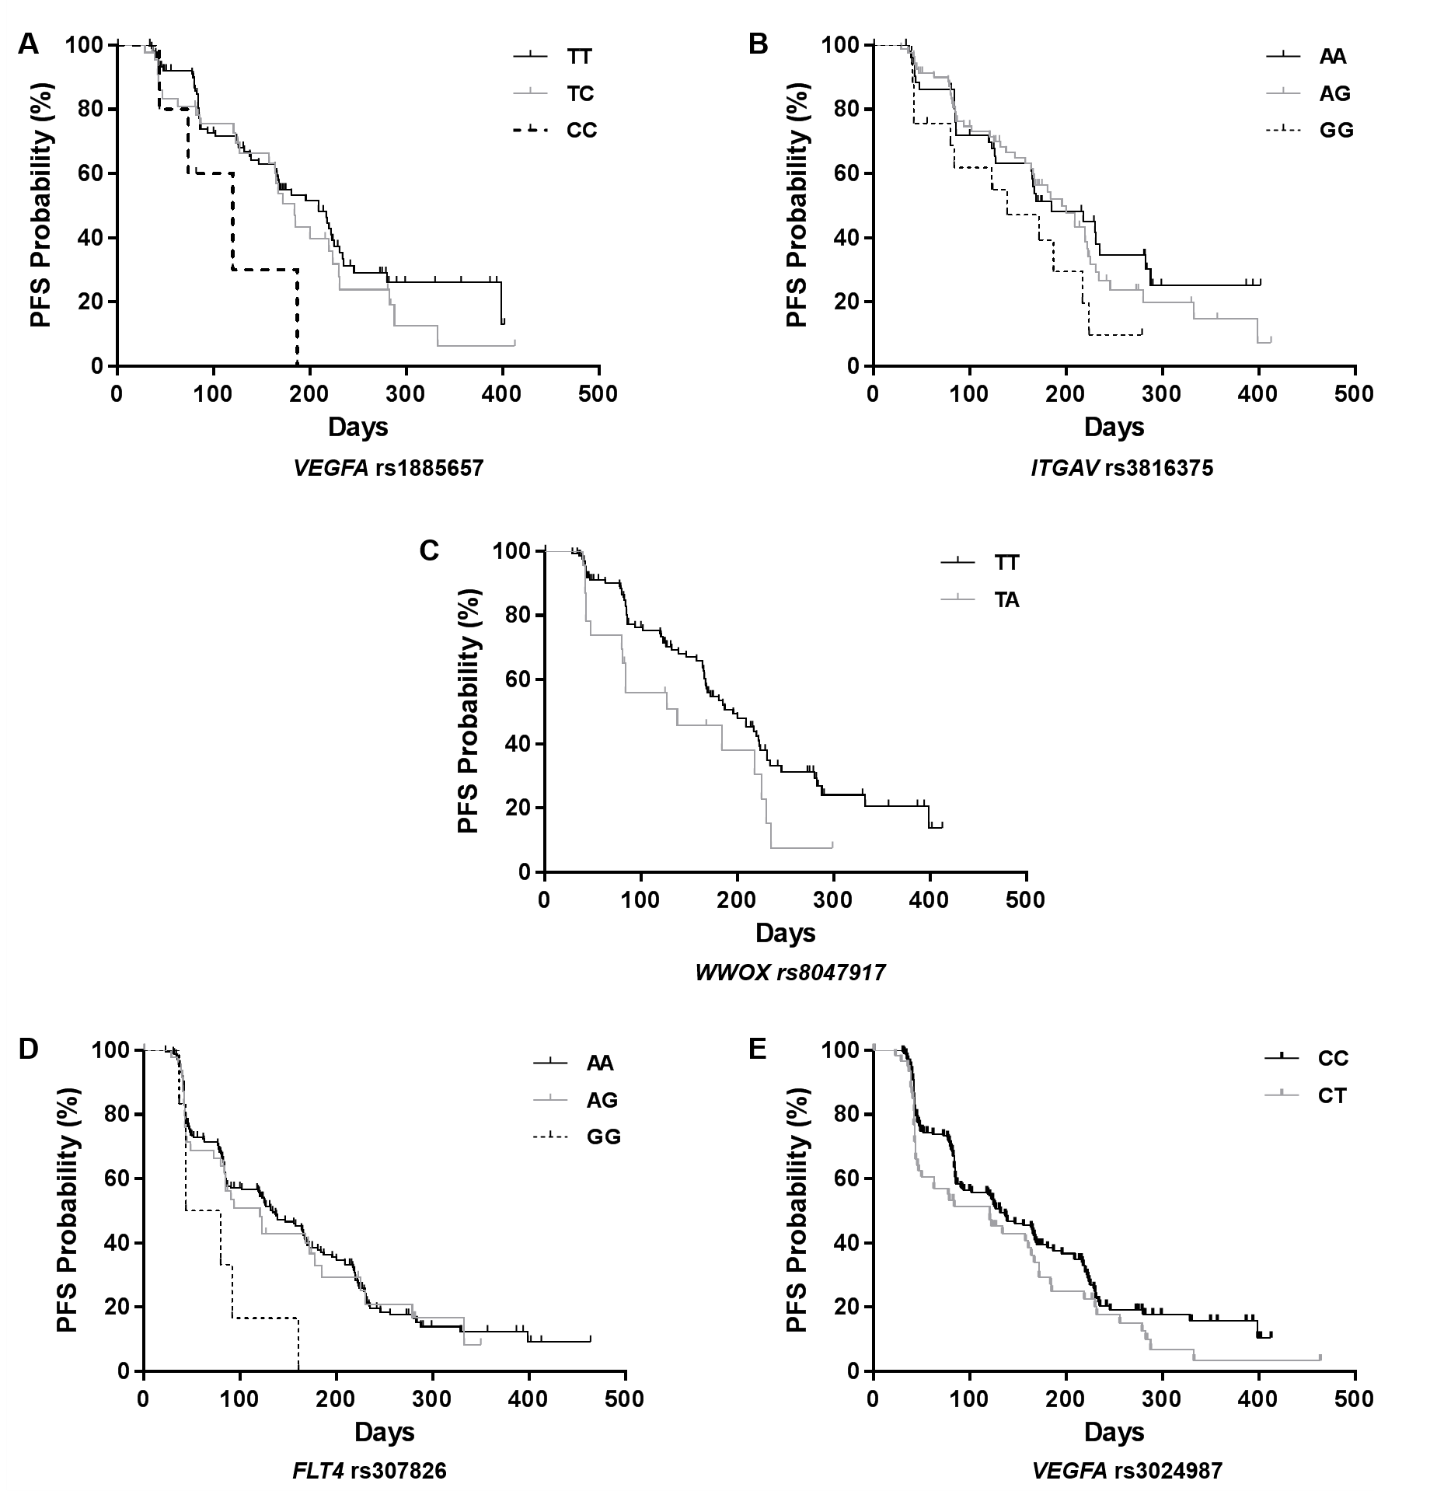

Supplement: 00085472can181089-sup-199993_2_supp_5113440_ph6cbt.docx [file 00085472can181089-sup-199993_2_supp_5113440_ph6cbt.docx]
