# Supplementary material for: Genetic Variants of VEGFA and FLT4 Are Determinants of Survival in Renal Cell Carcinoma Patients Treated with Sorafenib
Source: Oxford University Press journal article supplement (doi:10.1158/0008-5472.can-18-1089), 2018-11-01

**Figure S4. T494A is located in the 5th Ig-like domain of VEGFR-3.** **A)** A model of VEGF-C -induced dimerization of VEGFR-3 extracellular domain (ECD). Colored regions correspond to crystal structures of human VEGFR-3 and the domains in grey were derived by homology-modeling. Cartoon and semi-transparent surface models are shown, with the two chains of VEGFR-3 colored in blue or yellow, and the two chains of VEGF-C colored in orange. Thr494 (T494) is numbered and colored in red. **B)** Crystal structure representation of the 5th Ig-like domain of human VEGFR-3. T494, located in the long loop bearing the proteolytic cleavage site, is highlighted in green. **C)** The T494 sidechain does not significantly interact with rest of the domain.


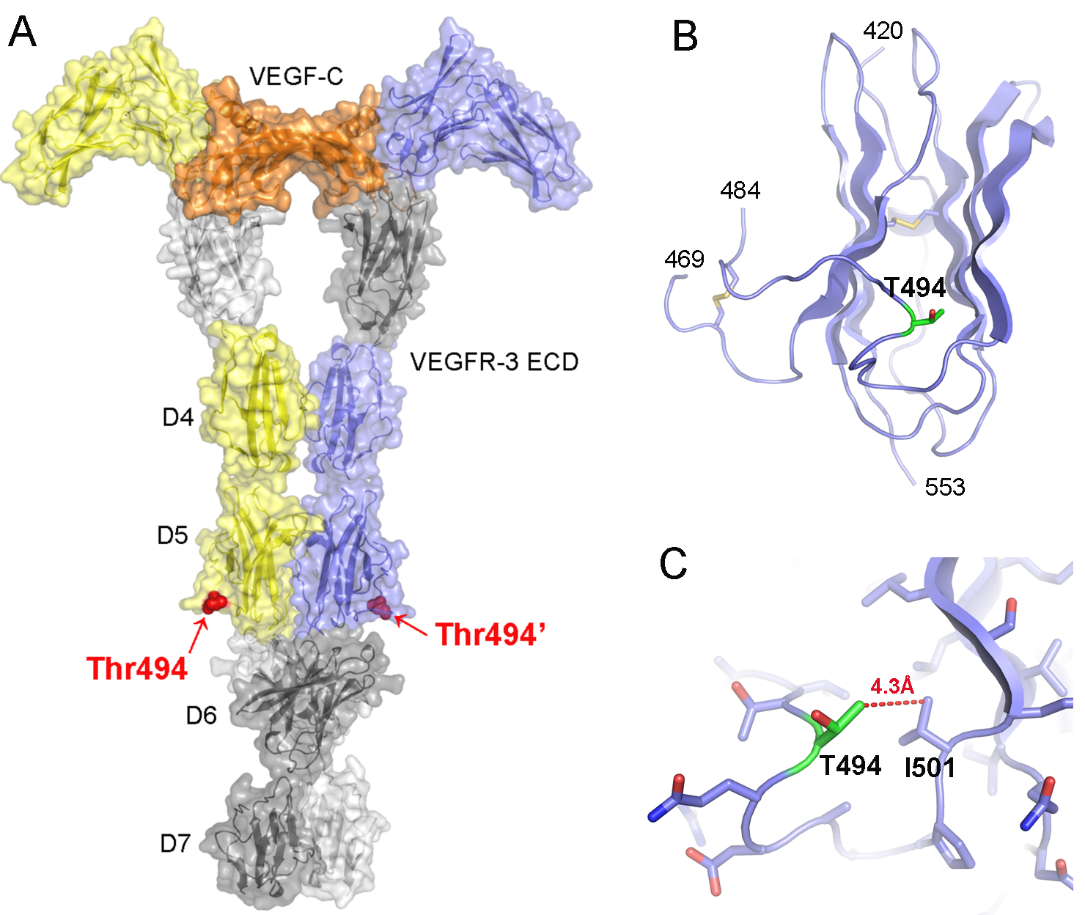

Supplement: 00085472can181089-sup-199993_2_supp_5113442_ph6cbt.docx [file 00085472can181089-sup-199993_2_supp_5113442_ph6cbt.docx]
